# Supplementary material for: A membrane-less enzymatic fuel cell with layer-by-layer assembly of redox polymer and enzyme over graphite electrodes
Source: Royal Society of Chemistry journal article supplement (doi:10.1039/c1cc15002b), 2011-01-01
Supplement: c1cc15002b.pdf [file c1cc15002b.pdf]

Cite this: DOI: 10.1039/c0xx00000x

www.rsc.org/xxxxxx

ARTICLE TYPE

## Supplementary information

### Experimental Section

#### 5 Materials

Synthesis of the redox polymers was achieved by adapting literature procedures<sup>1</sup> using  $(\text{NH}_4)_2\text{OsCl}_6$  (Aldrich) as starting material to prepare the *cis*-Os(4,4'-dimethoxy-2,2'-bipyridine)<sub>2</sub>Cl<sub>2</sub> and *cis*-Os(4,4'-dichloro-2,2'-bipyridine)<sub>2</sub>Cl<sub>2</sub> complexes, which were then complexed, via ligand substitution reaction in ethanol/water solvent, to a previously pre-synthesised polyvinylimidazole (PVI) polymer.<sup>2</sup> Glucose oxidase (GOx) from (*A. Niger*) was obtained from Sigma – Aldrich and *ThLacc* was donated by VTT Technology, Finland (K. Kruus). Unless otherwise stated all other chemicals were obtained from Sigma-Aldrich. All buffers were prepared from solutions of the selected base then adjusted to the desired pH using solutions of the acid.

#### Apparatus

Graphite disc electrodes (3 mm diameter), formed by shrouding graphite rods (Goodfellow) in glass tubes using heat-shrinkable tubing and establishing an electrical connection to copper rods (Farnell) at the rear with silver epoxy resin (Farnell), were used as working electrodes. Cyclic voltammetry was carried out with a CHI 650 potentiostat, using a graphite electrode, Ag/AgCl (3 M KCl) and platinum wire as working, reference and counter electrodes, respectively (IJ Cambria). EFCs were assembled by insertion of anode and cathode into a compartmentless electrochemical cell containing 5 mL of electrolyte solution. The anode and cathode were externally connected through a resistance box (IET Labs) over a resistance range of 5 MΩ to 1 kΩ, and the voltage between the electrodes measured with a multimeter (Keithley) for each load.

Film assembly was monitored at each step with a quartz crystal microbalance (QCM, USI Japan) with 9 MHz QCM resonators (AT-cut, International Crystal Mfg). The gold resonators were first treated with 4 mM 3-mercaptopropionic acid in ethanol overnight to form negative monolayer surface to mimic graphite surface. Films were assembled onto negatively charged gold resonator surface and were dried in a stream of nitrogen before measuring the frequency change ( $\Delta F$ ).<sup>3</sup>

#### Enzyme activity

Glucose oxidase was obtained from Sigma – Aldrich (10 mg/ml stock solution was prepared in phosphate buffer pH 7.4) and *Trametes hirsuta* (*ThLacc*) was provided by VTT (Finland) as (3.6 mg/mL) stock solution in citrate buffer pH 5. Enzyme activity was calculated using spectrophotometric assays (Agilent 8453). Glucose oxidase activity was monitored at 460 nm, where the increase in absorbance is a result of the oxidation of dianisidine through a peroxidase coupled system, using an extinction coefficient of  $11300 \text{ M}^{-1} \text{ cm}^{-1}$ , in phosphate buffer pH 6.<sup>4</sup> The enzymatic activity of the laccase was measured by monitoring the oxidation of 5 mM ABTS in 50 mM acetate buffer pH 4.5 at 420 nm over a period of 10 minutes using extinction coefficient of  $36000 \text{ M}^{-1} \text{ cm}^{-1}$ .<sup>5</sup>

#### Methods

Electrodes were prepared, based on LBL self assembly of redox polymer and enzyme.<sup>6</sup> For anode and cathode 10  $\mu\text{L}$  redox polymers (8–10 mg/ml solution/suspension in water) were adsorbed over graphite electrode for 20 minutes, then rinsed with milli Q water. Further enzymes 10  $\mu\text{L}$  GOx of 10 mg/ml (1500 U/ml), or *ThLacc* (390 U/ml) was adsorbed for 20 minutes, then washed with Milli Q water, further repeating these steps to form (polymer /enzyme)<sub>n</sub> films. Prepared films were dried for 12 h before testing electrochemically or EFC assembly. Unless otherwise stated, current and power densities were measured at 37 °C in 0.1M potassium phosphate buffered solutions containing 0.15 M NaCl, 0.1 M glucose and saturated O<sub>2</sub>.

#### Supplementary figures

**Figure S1.** QCM frequency shifts for alternate redox polymer – enzyme a) polymer I/GOx and b) polymer II/*ThLacc* adsorbed on gold resonators first coated with a monolayer of 3-mercaptopropionic acid rendering a negatively charged surface that mimics the self assembly at graphite electrode.

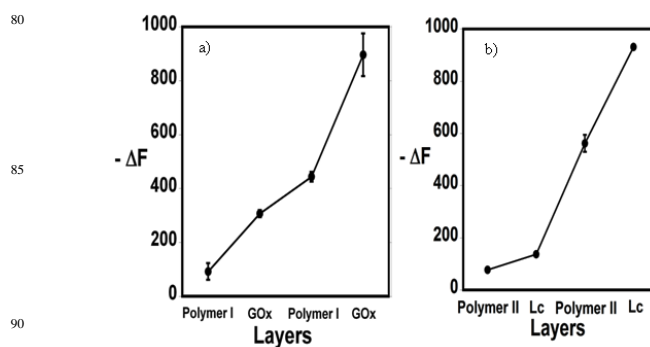

**Figure S2.** Power versus current density curve of an EFC composed (polymer I /GOx)<sub>2</sub> and (polymer II/ *ThLacc*)<sub>2</sub> films in oxygen-saturated 0.1 M potassium phosphate buffer containing 0.15 M NaCl at 37 °C, in the presence of 0.1 M glucose at pH 7.4 (closed circles) and 5.5 (open circles).

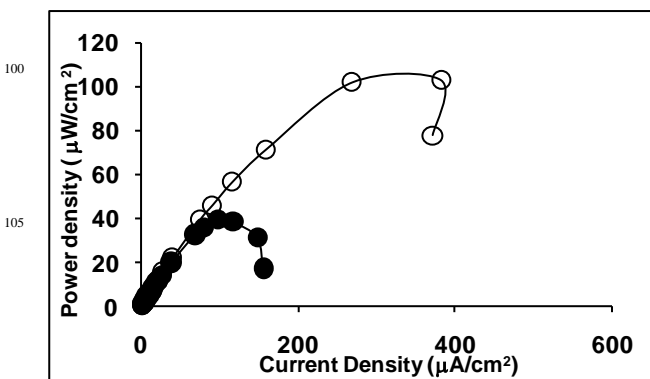

## References

1. E.M. Kober, J.V. Casper, B.P. Sullivan and T.J. Meyer, *Inorg. Chem.*, 1988 **27**, 4587.
2. R.J. Forster and J.G. Vos, *Macromolecules.*, 1990, **23**, 4372.
- 5 3. J.F. Rusling. In *Protein Architecture*; Y. Lvov, H. Mohwald, Eds.; Marcel Dekker: New York, 2000; Chapter 13, p 337.
4. H.U. Bergmeyer, Reagents for enzymatic analysis. In: *Methods of Enzymatic Analysis Vol I. (Eds: Bergmeyer HU, Gawehn K) Verlag Chemie, Weinheim .*, 1974, 494.
- 10 5. R. Bourbonnais, D. Leech and M.G. Paice, *Biochimica Et Biophysica Acta-General Subjects.*, 1998, **1379**, 381.
6. E. J. Calvo, R. Etchenique, L. Pietrasanta and A. Wolosiuk, *Anal. Chem.*, 2001, **73**, 1161.

15
